## A multilayered post-GWAS analysis pipeline defines functional variants and target genes for systemic lupus erythematosus (SLE)

Mehdi Fazel-Najafabadi<sup>1\*</sup>, Loren L. Looger<sup>2,3\*</sup>, Harikrishna Reddy-Rallabandi<sup>1</sup>, Swapan K. Nath<sup>1†</sup>

<sup>1</sup>Arthritis and Clinical Immunology Research Program, Oklahoma Medical Research Foundation, Oklahoma City, OK 73104, USA

<sup>2</sup>Department of Neurosciences, University of California, San Diego, San Diego, CA 92121, USA

<sup>3</sup>Howard Hughes Medical Institute, University of California, San Diego, San Diego, CA 92121, USA

\*Contributed equally

†To whom correspondence should be addressed:

Swapan K. Nath, PhD  
Oklahoma Medical Research Foundation  
825 NE 13<sup>th</sup> Street  
Oklahoma City, OK 73104  
Email: Swapan-Nath@omrf.org

### ***Competing Interest Statement***

The authors declare that the research was conducted in the absence of any commercial or financial relationships that could be construed as a potential conflict of interest

### ***Funding information***

This work was supported by Grant # AR060366 from National Institutes of Health to SKN.

### ***Ethics statements***

#### ***Studies involving human subjects***

This study involves various genomic data downloaded from public databases (1000Genomes data, various chromatin marks from ENCODE, and Summary GWAS), and cell lines bought from ATCC. This project was approved by Institutional Review Board, OMRF.

#### ***Inclusion of identifiable human data***

No potentially identifiable human images or data is presented in this study.

## Abstract

**Objectives:** Systemic lupus erythematosus (SLE), an autoimmune disease with incompletely understood etiology, has a strong genetic component. Although genome-wide association studies (GWAS) have revealed multiple SLE susceptibility loci and associated single nucleotide polymorphisms (SNPs), the precise causal variants, target genes, cell types, tissues, and mechanisms of action remain largely unknown.

**Methods:** Here, we report a comprehensive post-GWAS analysis using extensive annotation, molecular modeling, and integrative functional genomic and epigenomic analyses to optimize fine-mapping. We compile and cross-reference immune cell-specific expression quantitative trait loci (*cis*- and *trans*-eQTLs) with promoter capture Hi-C, allele-specific chromatin accessibility, and massively parallel reporter assay data to define predisposing variants and target genes. To assess our predictions, we experimentally validate a locus using CRISPR/Cas9 genome editing, qPCR, and Western blot.

**Results:** Anchoring on 452 index SNPs, we selected 9,931 high-linkage disequilibrium ( $r^2 > 0.8$ ) SNPs and defined 182 independent non-HLA SLE loci. 3,746 SNPs from 143 loci were identified as regulating 564 unique genes. Target genes are enriched in lupus-related tissues and associated with other autoimmune diseases. Of these, 329 SNPs (106 loci) showed significant allele-specific chromatin accessibility or enhancer activity, indicating regulatory potential. Using CRISPR/Cas9, we validated rs57668933 as a functional variant regulating multiple targets, including SLE risk gene *ELF1*, in B-cells.

**Conclusion:** We demonstrate and validate post-GWAS strategies for utilizing multi-dimensional data to prioritize likely causal variants with cognate gene targets underlying SLE pathogenesis. Our results provide a catalog of significantly SLE-associated SNPs and loci, target genes, and likely biochemical mechanisms, to guide experimental characterization.

## Introduction

Systemic lupus erythematosus (SLE, lupus) is a complex autoimmune disease with substantial genetic underpinnings, *e.g.*, strong familial aggregation<sup>1-3</sup>, large twin concordance (monozygotic>dizygotic)<sup>1,4</sup>, and high sibling recurrence risk ratio ( $\lambda_s \sim 30$ )<sup>5</sup>. >50 candidate gene studies and genome-wide association studies (GWAS) have identified >100 SLE risk loci ( $p$ -value  $< 5 \times 10^{-8}$ ), across multiple ethnicities<sup>6-11</sup>. However, these loci explain only ~30% of SLE heritability ( $h^2$ )<sup>7,8,12</sup>.

In addition to incomplete knowledge of precise risk loci and alleles underlying GWAS peaks, it is not generally understood how such alleles mechanistically contribute to disease. For a given locus, GWAS often reports a sole (“index”) single nucleotide polymorphism (SNP), which may or may not itself be functional, but is likely in linkage disequilibrium (LD) with disease-predisposing SNPs<sup>13,14</sup>. As in other complex diseases, >90% of reported SLE index SNPs are non-coding (intronic and intergenic). A major challenge in the post-GWAS era is to precisely identify predisposing coding and non-coding SNPs and their associated target genes, and to determine the molecular mechanisms underlying disease risk.

Accurate association determination remains a nontrivial challenge in clinical genomics and genome informatics. Generally, post-GWAS analyses combine multiple GWAS signals using LD structure and epigenetics<sup>15-17</sup>. Additional data sources, such as multiple independent, consistent annotations, greatly assists prioritization of likely functional SNPs<sup>18-20</sup>. SNPs can modulate transcription factor (TF) binding and chromatin structure, altering gene regulation. Indeed, *cis*- and *trans*-expression quantitative trait locus (eQTL) analyses frequently link disease-associated alleles to specific gene/isoform expression<sup>21</sup>. Together, annotating open, active chromatin from DNase I hypersensitivity and Assay for Transposase-Accessible Chromatin (ATAC-seq) peaks<sup>22</sup>, alongside individual genomic regulatory elements (promoters, enhancers, silencers, *etc.*) using histone marks, chromatin modifiers, and transcription factors, and by *in silico* bioinformatics<sup>23,24</sup>, yields a powerful framework for testing GWAS hypotheses.

Multiple databases (*e.g.*, ENCODE, RoadMap) integrate histone mark data from common cell lines to create consensus regulatory region annotation<sup>25-27</sup>. Moreover, combining ATAC-seq and

gene expression data yields chromatin accessibility QTL (caQTLs) to identify SNPs with allele-specific effects (*e.g.*, allelic imbalance)<sup>28,29</sup>. Genomic regulatory elements communicate with one another and target genes through complex three-dimensional chromatin interactions (topologically associating domains, TADs). Various chromatin conformation capture (3C) technologies<sup>30,31</sup> annotate TADs and other chromatin features. Such interactions, particularly direct enhancer-promoter interactions<sup>32</sup>, underlie long-range enhancer activity<sup>33,34</sup>, and can aid GWAS interpretation.

Finally, recent methods like Massively Parallel Reporter Assays (MPRAs) simultaneously screen thousands of SNPs for transcriptional enhancer activity, providing information about SNP genomic context and allele behavior<sup>35</sup>.

We compiled all available data on the above features and cross-referenced them to predict locus/SNP functionality. Genomic regions can assume different activities in different cell types; we matched datasets taken from the same cell type. Further, when possible, annotations were taken from data derived solely from immune cells<sup>23,32,36-39</sup>. This ensures consistency and identifies cell types relevant to pathogenesis<sup>40</sup>. This approach has revealed target genes and cells associated with rheumatoid arthritis<sup>41</sup> and breast cancer<sup>42</sup>, among others.

For protein-coding SNPs, these techniques are applied, as many exons contain TF-binding sites and/or promoters/enhancers<sup>43</sup>; we also consider effects on protein structure and function.

Using an integrated approach, we collate and reassess published SLE-GWAS association signals along with high-LD SNPs, incorporating diverse data on underlying genomic features. For each locus, we define potential functional variants and their cognate target genes in immune cells. We prioritize functional SNPs and assign associated target genes and modulated biochemical pathways. As proof of concept, we used CRISPR-Cas9 genome editing, qPCR, and protein blotting to validate allelic effects of a candidate SNP on SLE risk gene *ELF1*.

## Methods

### *Study design*

Our workflow and study design are shown in **Figure 1**. 1) From qualified studies, we collated all reported and replicated index and correlated SNPs to define statistically-independent SLE susceptibility loci. 2) We predicted SNP effects in statistically-independent loci and annotated them in regulatory tiers. 3) We performed molecular modeling on coding SNPs. 4) We leveraged cell type-specific *cis*- and *trans*-expression quantitative trait loci (eQTLs) and promoter-capture Hi-C (PCHiC) data to define “enhancer” and “promoter” SNPs and target genes. 5) We estimated locus overrepresentation in molecular pathways and gene ontology categories and identified cell type-specific SNP enrichment in epigenetic features. 6) We used chromatin accessibility QTLs (caQTLs) and massively parallel reporter assay (MPRA) data to identify allele-specific effects. 7) We experimentally validated a functional variant using CRISPR/Cas9-based activation/silencing in B-cells.

### *Collating variants*

We performed an exhaustive literature search from SLE association studies (to September 2021), both GWAS and candidate-gene studies with sample sizes >2,000, selecting genome-wide significant ( $P < 5 \times 10^{-8}$ ) index SNPs (**Table 1**). Given numerous SNPs at each locus, strong linkage disequilibrium (LD) between them, and sparse genotyping coverage, index SNPs likely don't mechanistically underlie GWAS signals. To identify likely “causal” SNPs underlying association signals, we first expanded each locus to its LD region. Loci were considered independent if separated by >250 kb and in very low LD ( $r^2 < 0.2$ ). The HLA region (hg19, chr6: 28,477,797-33,448,354) was condensed into a single locus and removed.

We extracted all population-relevant LD SNPs from major populations (EUR=European, EAS=East Asian, SAS=South Asian, AFR=African, and AMR=Mixed American) in 1000Genomes Project Phase III around each index SNP using NIH LDlink<sup>44</sup>, using only high-LD SNPs ( $r^2 > 0.8$ ).

### ***Regulatory region annotation***

PredictSNP2<sup>45</sup>, a consensus classifier combining five prediction tools supplemented by experimental annotation from eight databases, initiated SNP annotation, supplemented by GENCODE GRCh37.36<sup>46,47</sup>, Haploreg<sup>48</sup>, Ensembl GRCh37.87 (<https://ftp.ensembl.org/pub/grch37>), GenoSTAN<sup>27</sup>, silencerDB<sup>26</sup>, eQTLgen<sup>49</sup>, ImmuNexUT<sup>50</sup>, and EpiMap<sup>25</sup>.

For enhancer annotation, we used GenoSTAN (127 cell types and tissues from ENCODE and Roadmap<sup>27</sup>) and EpiMap<sup>25</sup> (3,030 aggregated and uniformly-reprocessed references from ENCODE, Roadmap, and Genomics of Gene Regulation). We imputed 14,952 datasets across 859 biosamples and 18 chromatin marks/assays. We used GenoSTAN to predict promoter and enhancer activity and silencerDB (33,060 experimentally-validated and 5,045,547 predicted silencers from machine learning) for silencers. For allele-specific enhancers, we used Massively Parallel Reporter Assays (MPRAs) on >3,000 SNPs with both alleles present<sup>51</sup>. We also used chromatin accessibility quantitative trait loci (caQTLs)<sup>29,36</sup> to further fine-map and annotate (allele-specific) SNP regulatory aspects.

### ***Target genes***

We used two methods to determine SNP targets. First, SNPs were annotated with *cis*- and/or *trans*-expression QTLs (eQTLs) and splicing QTLs (sQTLs) using multiple databases. We extracted immune cell-specific expression data from GTEx V8<sup>36</sup>, Blood eQTL<sup>39</sup>, DICE<sup>37</sup>, ImmuNexUT<sup>50</sup>, and eQTLgen<sup>49</sup>. SNP-gene pairs (GTEx QTLs with  $p < 1e-4$  and/or “is\_best” flag, or false-discovery rate (FDR)  $< 0.05$  for other sources) were recorded. We obtained blood sQTLs from GTEx V8. For *trans*-eQTLs, we overlapped SNPs with blood cell-based curated *trans*-eQTLs from the eQTLgen Consortium<sup>49</sup> (31,684 individuals from 37 cohorts). We set the *trans*-eQTL FDR threshold stringently ( $1e-5$ ). To identify SNPs interacting with enhancers and promoters through chromatin interactions, we overlapped associated SNPs within anchors of chromatin interactions in immune cells with available promoter capture Hi-C (PCHiC)<sup>23,32</sup> data. Given that some interactions between enhancers and targets are distal, we annotated colocation of candidate SNPs within PCHiC loops. To identify candidate promoter-SNP pairs, we annotated each SNP with nearby PCHiC loops from immune cells.

### ***SNP/geneset enrichment analysis***

Gene targets of functional SNPs were tested for enrichment in Gene Ontology (GO) categories, pathway membership, and disease association. Enrichment analysis was carried out using FUMA<sup>17</sup> and epiCOLOC<sup>52</sup> on different genesets identified through target-type annotations.

### ***Transcription factor binding***

Binding sites were annotated from UCSC Genome Browser GRCh37/hg19 JASPAR core 22.

### ***Protein models***

Protein models were taken from AlphaFold2 and illustrated with PyMOL.

### ***CRISPR-based functional validation***

We used CRISPR/Cas9 activation/silencing (CRISPRa/i) to bring activating or silencing domains to rs57668933. Briefly, single-guide RNA (sgRNA)/Cas9-RNP complex was prepared at room temperature in Cas9 buffer. RNP complex was transfected into NA18535 LCL cells with Neon Electroporation and allowed to express for 72 hours.

### ***qPCR***

qRT-PCR was performed on WT, CRISPRa, and CRISPRi cells, as described elsewhere<sup>53</sup>. RNA was isolated from WT and CRISPRa/i cells using an RNA Mini kit (Zymo Research). RNA was synthesized using iScript Reverse Transcription Supermix cDNA synthesis kit (Bio-Rad). We measured *ELF1* expression and analyzed results for significance using Prism V.7 (GraphPad).

## **Results**

### ***Defining independent SLE candidate loci***

Overall, we identified 452 reported genome-wide significant ( $P < 5 \times 10^{-8}$ ) non-HLA index SNPs from 76 different GWAS and candidate gene studies (**Supplementary Table 1**). Most index SNPs derived from East Asian and European ancestry (**Supplementary Figure 1**). Most (242, 53.5%) index SNPs lay within 145 genes; 210 (46.5%) were intergenic (**Figure 1, Supplementary Table 1**).

We then collected SNPs in high ( $r^2 > 0.8$ ) linkage disequilibrium (LD) with index SNPs, finding 9,479 – totaling 9,931 SNPs for our study. We binned these into 182 statistically-independent loci (**Supplementary Table 1&2, Supplementary Figure 1c**); with median locus size of 57.7 kb [range 314 bp – 1.15 Mb]. Of the 182 loci, 89 contained single index SNPs; the rest had 2-14 (**Supplementary Table 7**). Total linked SNPs per locus ranged from 1-1,148 (median 26; **Supplementary Table 7**). Correlated SNPs per index SNP ranged from 1-146 (median 24). Fifteen loci had single index SNPs and no LD-SNPs; conversely, LOC\_180 had two index SNPs and 1,146 LD-SNPs. The physical distance between index SNPs and LD-SNPs varied from 1 bp to 499 kb (median 14 kb).

The 182 independent loci contain 426 genes. Of our 9,931 total SNPs, 47.0% are intronic, 0.9% synonymous, 0.9% missense, and 51.2% intergenic (**Figure 1, Supplementary Table 2**). We annotated all 9,931 SNPs for *cis*- and *trans*-regulatory effects. The 89 missense SNPs potentially alter both gene product and expression level and were additionally characterized by molecular modeling.

### ***Annotation pipeline***

To annotate and prioritize these 9,931 SNPs at 182 loci/426 genes, we established this pipeline: 1) collate eQTLs, 2) collate PCHiC, 3) combine these initially classify SNPs, 4) add histone mark and MPRA data, 5) refine GWAS peaks with caQTLs, 6) experimentally test prioritized SNPs. caQTLs appear much narrower than many other GWAS signals<sup>29</sup>; however, of immune cells, they are currently only available for B-cells. As such, we placed them late in our pipeline, so that the initial prioritization covers all cell types. As caQTL data becomes more widely available for other cell types, placing this step earlier in the pipeline could narrow GWAS peaks sooner.

### ***eQTLs***

We first annotated all SNPs with *cis*- and *trans*-eQTLs and associated target genes, using only immune cell-specific data. Most SNPs (9,052) have  $\geq 1$  significant *cis*-eQTL [range 0-31; 856 SNPs have single *cis*-eQTLs and 5,539 have  $\leq 5$  *cis*-eQTLs] (**Supplementary Table 2**). *cis*-eQTL targets are enriched in immune-related genes, with many being known SLE risk loci. In



LOC\_13, rs17849501 (Neutrophil cytosol factor 2, *NCF2*) is an eQTL of several genes in multiple immune cell types. We experimentally demonstrated strong, allele-dependent enhancer activity of this SNP<sup>54</sup>. In LOC\_66, rs2431697 (intergenic) affects expression of multiple genes across cell types. This SNP has been experimentally shown to physically associate with the promoter of miRNA-146a (10.1038/s41467-020-20460-1), a potent immune regulator<sup>55</sup> and SLE biomarker<sup>56</sup>. In LOC\_76, SLE risk SNP rs2230926 (Tumor necrosis factor, alpha-induced protein 3, *TNFAIP3*) greatly increases neutrophil extracellular traps and citrullinated epitopes in SLE patients<sup>57</sup>. In LOC\_83, rs13239597 (intergenic) is an experimentally-validated allele-specific enhancer of Interferon regulatory factor 5 (*IRF5*)<sup>58</sup>, a key SLE risk gene.

For *trans*-eQTLs (having target genes >1 Mb or on another chromosome), we identified 75 SNPs from 22 loci targeting 272 unique genes (range 1-149 per locus; 20 out of 22 *trans*-eQTLs had 1-11 target genes) with FDR <1e-5 (**Supplementary Tables 8, 9**). Among them, 13 target genes were distal, and 259 on different chromosomes. Among 75 *trans*-eQTL SNPs, 73 were also identified as *cis*-eQTLs. At LOC\_121 (*SH2B3*, *ATXN2*), all 8 *trans*-eQTL SNPs showed >100 target genes, demonstrating substantial interactions across the genome. Consistent with this, *SH2B3* (*a.k.a.* lymphocyte adaptor protein, *LNK*) links numerous immune signaling pathways to inflammation<sup>59</sup> and is a major immune regulator. LOC\_79 (*IKZF1*) had one *trans*-eQTL (rs4917014) with 50 target genes. Many target genes were themselves immune-related and often SLE-associated. For example, rs1990760, a regulatory coding SNP at *IFIH1* (LOC\_31), is defined for lupus susceptibility<sup>60</sup>. This SNP is also a *trans*-eQTL targeting nine genes (*MX1*, *IFI44L/IFI44*, *HERC5*, *IFIT1/IFI6*, *OAS3/OAS2*, *HERC6*) significantly enriched in immune response network and type I/II interferon signaling genes. Interestingly, seven (*MX1*, *IFI44L/IFI44*, *HERC5*, *IFIT1/IFI6*, *OAS3*) and four (*MX1*, *IFI44L/IFI44*, *HERC5*) target genes were also targeted by LOC\_97 and LOC\_99, respectively (**Supplementary Table 8**), suggesting that coregulation of core genes further amplifies *trans*-effects in an omnigenic model<sup>61</sup>.

### **Chromatin interactions**

We performed an independent analysis using PCHiC data on immune cell lines<sup>23,32</sup>. The 6,198 SNPs had  $\geq 1$  PCHiC connection (762 SNPs had 1; 3,322 SNPs had  $\leq 5$ ; maximum 93).

Combining eQTL and PCHiC datasets, our SNPs target 3,504 unique genes (**Supplementary Tables 2, 4**).

### ***SNP categorization***

Concordance between eQTL and PCHiC annotation suggests that a given SNP has a strong regulatory role; thus, we based SNP tiers on this intersection (**Figures 1-2, Supplementary Table 4**). Tier1 includes SNPs annotated by both methods with non-zero target gene overlap. These SNPs (3,746 from 143 loci) have strong evidence of controlling expression of specific target genes. 1,906 SNPs (17 loci; Tier2) were annotated by both methods but targeted different genes. Tiers 3a and 3b (546 SNPs, 11 loci, 3,400 SNPs, 6 loci) showed either PCHiC or eQTL activity, respectively, but not both. Finally, 333 (Tier4) exhibited neither activity. Of 9,052 *cis*-eQTL SNPs, 3,746, 1,906, and 3,400 were categorized as Tier1, Tier2, and Tier3b, respectively. Of 75 *trans*-eQTL SNPs, 50, 11, and 14 were Tier1, Tier2, and Tier3b, respectively.

### ***Regulatory elements***

Linked SNPs were closely associated with transcriptional regulatory regions annotated by GenoSTAN and other databases; 4,332 (43.6%) lie in annotated promoter, enhancer, and/or silencer regions (**Supplementary Table 2**). Of 9,059 eQTL SNPs, 3,457 (38.1%) lie in enhancers, 625 (6.9%) in promoters, 485 (5.4%) in both, and 670 (7.3%) in silencers. We observed median 13 transcriptional element-associated SNPs per locus (4 loci had no such SNPs; LOC\_71 had 360). The bulk were Tier1/Tier2 SNPs, indicating a relationship between transcriptional regulatory elements and eQTL/PCHiC activity. Enhancer SNPs that are also eQTL SNPs had a median distance of 47.2 kb to their target genes' transcription start sites (TSS); for Tier1 SNPs, this distance was 45.0 kb. Enhancer SNPs that are also PCHiC SNPs had a median distance of 214.5 kb to their target genes' TSS; for Tier1 SNPs, this distance was 193.3 kb (**Supplementary Table 1, 4**). Tier1 SNPs are substantially closer to their target genes than other tiers, consistent with strong regulatory effects.

Of all regulatory element-associated SNPs, 117 (from 32 loci) were Tier1 SNPs with 1-4 common target genes, leading to 58 unique genes targeted in both eQTLs and PCHiC. Of enhancer SNPs, 93 (26 loci) were Tier1, together targeting 44 unique genes (**Supplementary**

**Table 2).** These SNPs, which are in annotated enhancers, are involved in chromatin interactions, and transcriptionally regulate specific target genes, represent highly prioritized candidates and are given further attention below.

### ***Massively parallel reporter assays***

As an independent measure of SNP effects on transcription, we mined massively parallel reporter assay (MPRA) datasets, which characterize enhancers in high-throughput<sup>62</sup>. We examined MPRA data from B-cells (GM12878)<sup>51</sup>. A total of 2,614 SNPs appeared in this dataset, and 42 out of 51 significant ones showed allele-specific expression (ASE; FDR<0.01; **Supplementary Tables 12, 13**). MPRA-ASE SNPs were overwhelmingly non-coding: 50 intergenic, 46 intronic, 1 synonymous, 1 missense.

### ***Deleteriousness scores***

We annotated SNPs with pre-computed deleteriousness scores (predictSNP2, CADD, GWAVA)<sup>45</sup>. Of exonic SNPs (177 in 61 loci, 91 unique protein-coding genes; 89 missense from 43 loci, 57 unique genes), the algorithms identified 11, 26, and 37 deleterious SNPs, respectively. For missense SNPs, 9, 17, and 37, respectively, were labeled deleterious. For non-coding SNPs, 516 (55% intronic, 45% intergenic) were identified as deleterious by at least one algorithm (**Supplementary Table 3**).

### ***Chromatin accessibility***

We next annotated our SNPs according to two measures of chromatin accessibility: DNase hypersensitivity and ATAC-seq (whole blood). As before, Tier1 had by far the largest signals, followed by Tier2 and 3a (**Supplementary Figure 2**). Tiers 3b and 4 showed essentially zero enrichment.

### ***caQTL SNPs***

To identify SNPs with allele-specific chromatin accessibility, we searched a caQTL database from lymphoblastoid (B-cell) cell lines (LCLs) from ten ethnicities<sup>29</sup>. caQTL peaks are quite narrow<sup>63</sup>; however, the method is new and of immune cells, has only yet been applied to LCLs. Thus, although the technique dramatically reduces SNP numbers, these results are specific to B-

cells. SLE, of course, manifests through numerous cell types; this analysis is only a subset of associated SNPs. As caQTLs are determined in more cell types, this analysis can be extended.

Of our SNPs (covering 100 loci), 295 appeared as caQTLs in  $\geq 1$  ancestry. Among our 182 loci, 100 had  $\geq 1$  caQTL SNP (range 1-16); 73 loci had  $\geq 1$  Tier1 caQTL SNP. All but one caQTL SNP were also eQTL SNPs. Of 295 caQTL SNPs, 194 are Tier1, 46 Tier2, 6 Tier3a, 48 Tier3b, and 1 Tier4 (**Supplementary Table 11**). Thus, caQTL SNPs are heavily enriched in high-tier SNPs, illustrating that SNP-driven changes in chromatin accessibility strongly contribute to downstream expression and chromatin interaction phenotypes. Of 295 caQTL SNPs, 235 (79.7%) lie in enhancers, 91 (30.8%) in promoters, 63 (21.4%) in both, and 19 (6.4%) in silencers. This is consistent with eQTL and MPRA data, although caQTL SNPs are substantially more enriched with enhancer SNPs.

### ***Transcription factor binding***

Next, we independently annotated transcription factor (TF) binding sites using epiCOLOC<sup>52</sup>. Tier1 SNPs showed by far the most TFs (89) with binding site enrichment (**Supplementary Figure 3**), with Tier2 next. Tier3a showed small enrichment, and Tiers 3b and 4 were negligible. TFs highly represented in Tier1/Tier2 SNPs include Brachyury/TBXT, TCF4, MYB, and NFkB1—all critical immune-linked proteins. In fact, these TFs have clear involvement in SLE pathogenesis<sup>64-69</sup>. Altogether, TFBS enrichment strongly correlates with eQTL/PCHiC activity, and enriched TFs were immune-linked and SLE-associated.

### ***Tissue expression***

Next, for our collected loci, we tabulated expression in diverse tissues using FUMA GENE2FUNC. Tier1 loci target genes were significantly enriched (FDR <0.001) in whole blood and lymphocytes (**Supplementary Figure 4, Supplementary Table 5**). As before, lower tiers were much less enriched in these tissues and demonstrated less tissue enrichment overall.

### ***Disease and pathway association***

We searched disease GWAS association catalogs; Tier1 loci target genes were significantly overrepresented in 154 out of 310 traits/diseases. SLE, rheumatoid arthritis (RA), and

inflammatory bowel disease (IBD) were particularly enriched in GWAS hitting these loci. Lower tiers were much less linked to GWAS hits. Similarly, Tier1 loci target genes were highly enriched among KEGG pathways (36 out of 68) and gene ontology (GO) classifications (464 out of 1,374), whereas lower tiers were not. Tier1 loci-associated pathways included immune system regulation, cytokine production, phosphorus metabolism, and regulation of protein modification and interferon signaling. Further studies are required to flesh out exact pathways and mechanisms by which these highly associated SNPs contribute to dyshomeostasis and SLE progression; these results will prioritize avenues for experimental investigation.

### ***Missense SNPs***

We highlight several missense SNPs predicted to dramatically disrupt protein function. rs78555129 mutates a universally conserved arginine in adipolin (CTRP12/FAM132A/C1QTNF12) to cysteine, perturbing protein folding and presumably interactions with its (currently unknown) receptor (**Supplementary Figure 5a**). Adipolin is an anti-inflammatory adipokine implicated in diabetes, arthritis, and obesity<sup>70</sup>. In B-cell scaffold protein with ankyrin repeats 1 (BANK1), rs10516487 destabilizes the protein (**Supplementary Figure 5b**), likely interfering with its interactions with TRAF6 and MyD88 in innate immune signaling<sup>71</sup>. rs201802880 in Neutrophil Cytosolic Factor 1 (NCF1/p47phox) mutates a universally conserved residue (**Supplementary Figure 5c**), leading to protein destabilization. NCF1 is a subunit of NADPH oxidase, which produces reactive oxygen in the phagosome, critical for immune responses<sup>72</sup>. rs2230926 in TNF $\alpha$ -Induced Protein 3 (TNFAIP3) mutates a universally conserved residue important for protein stability (**Supplementary Figure 5d**). TNFAIP3 is indispensable to TNF signaling and immune activation and is an SLE risk gene<sup>73</sup>.

### ***CRISPR-based validation of rs57668933***

To validate our approach, we used CRISPRa and CRISPRi targeting the rs57668933 locus for activation and inhibition, respectively (**Figure 3e**). Both activation domains doubled *ELF1* expression levels, and both suppressor domains halved it. Thus, rs57668933 is indeed within a strong enhancer, consistent with our other data.

## **Discussion**

We have established a state-of-the-art SNP and locus analysis pipeline for assimilating data regarding gene expression, chromatin accessibility and interactions, histone marks, transcription factor binding, tissue expression, and disease association. Our analysis pipeline dramatically reduces large sets of associated SNPs to several likely causal SNPs for experimental validation. This pipeline will be useful for diverse genetic association studies.

After carefully gathering all high-quality SLE GWAS and candidate gene studies up to September 2021 and their high-LD SNPs from 1000Genomes Project Phase3, we defined 182 statistically-independent, non-HLA loci totaling ~10,000 SNPs. Our analysis first focused on SNPs with effects on gene expression; unsurprisingly, these SNPs were overwhelmingly non-coding in nature, and very often localized to enhancer regions. We also found many missense SLE-associated SNPs. These SNPs had high deleteriousness scores from other pipelines; in fact, 30% of the most deleterious SNPs were missense, compared to 1.7% of all SNPs. This dramatic enrichment supports their involvement; it should be noted, though, that CADD and other programs generally view missense SNPs as more deleterious. In further support, our molecular modeling showed that many missense SNPs adversely affect protein structure and/or function.

Intriguingly, we found several examples of SNPs encompassing both effects: they were simultaneously missense SNPs with adverse predicted effects on protein function, and enhancer SNPs affecting expression of multiple other genes. This is perhaps unsurprising, as exonic transcription factor binding sites and enhancers are common<sup>43</sup>. For instance, we again found rs1143679, mutating a key residue of integrin alpha M (ITGAM) and disrupting multiple transcription factor binding sites, dramatically weakening enhancer activity<sup>74</sup>.

Only 45 loci contained missense SNPs; most SNPs were non-coding. Our pipeline prioritized SLE risk SNPs and tiered them according to target gene expression (eQTL) and chromatin interactions (PCHiC). We obtained 3,746 Tier1 SNPs, where the two independent experiments identified common regulated genes. Of these, 1,913 are also enhancer-SNPs. Overall, 100 loci had  $\geq 1$  caQTL SNP (total 295), and 22 loci had  $\geq 1$  allele-specific enhancer SNP (total 42). Together, these constitute 106 out of 182 total SLE loci (329 total SNPs) flagged by  $\geq 3$  independent experimental methods regarding gene regulation: eQTL-chromatin interaction-

chromatin accessibility (B-cells) or eQTL-chromatin interaction-enhancer histone marks (**Table 1, Supplementary Table 2**). Adding MPRA data (GM12878 cells), yielded a final set of six loci (6 SNPs; Table 2) flagged by all available experimental methods with highly significant changes in eQTLs, chromatin accessibility, and target gene expression. These SNPs are predicted to be highly associated with SLE, with effects manifested through enhancer-driven alteration of target gene expression, and mediated at least somewhat through B-cells.

We examined these SNPs in detail. rs57668933 (intron of lymphoid cell transcription factor E74-like factor 1, *ELF1*), at LOC\_125 (Chr 13), controls *ELF1* expression (**Figure 3a-b**). The protective T allele correlates with higher *ELF1* expression in T-cells, B-cells, and monocytes in healthy controls (**Supplementary Figure 7**) and shows high allele-specific chromatin accessibility (**Figure 3c**) and enhancer activity (**Figure 3d**). *ELF1* has been previously reported as an SLE risk gene (lead SNP rs7329174<sup>75</sup>)—we show that rs57668933 is instead the likely causal SNP, with the risk allele yielding lower chromatin accessibility and *ELF1* expression. *ELF1* represses FcR $\gamma$  expression<sup>76</sup>; SLE patients' T-cells express essentially no *ELF1* but high levels of FcR $\gamma$ , which activates immune reactivity and promotes nephritis<sup>77</sup>. In B-cells, *ELF1* regulates antibody heavy chain production<sup>78</sup>. This SNP disrupts universally conserved binding sites for the tumor suppressors p63 and p73 (**Supplementary Figure 6a**), both with strong immune contributions<sup>79</sup>.

All six SNPs show much experimental evidence linking them to SLE. Most disrupt highly conserved binding sites of critical immune transcription factors (**Supplementary Table 14, Supplementary Figure 3**). Target genes and disrupted transcription factors are known autoimmune risk genes, implicated in multiple diseases (**Supplementary Table 5**). Many selected SNPs are far from index SNPs and do not appear in the literature, highlighting the pipeline's ability to localize signals in large GWAS peaks.

Beyond the six most highly selected SNPs (Table2), our Tier1 hits and associated targets were very strongly enriched in immune-related genes. High-tier SNPs were also greatly enriched in SNPs flagged as deleterious by other methods. Overall, putative risk loci and target genes were overwhelmingly enriched in immune genes, with many being known risk for SLE, rheumatoid

arthritis, systemic sclerosis, Crohn's disease, Sjögren's syndrome, primary biliary cholangitis, and particularly inflammatory bowel disease. We experimentally validated a high-priority SNP with CRISPR/Cas9 gene activation/silencing, confirming that this site does indeed have dramatic enhancer activity, likely underlying SLE association. This experimental support for SNPs and loci prioritized by our analysis supports its utility in selecting likely underlying SNPs from GWAS peaks.

Our study has two major limitations: 1) Sparse MPRA data means that some loci might have unflagged causal variants, 2) Sparse caQTL data limits the strongest conclusions to B-cells at this time. Generation of more MPRA data and caQTL data in other cell types will refine existing loci, add further ones, and extend applicability to more diseases.

In conclusion, we demonstrate and validate strategies, and provide a pipeline that will be useful for diverse post-GWAS studies. The SLE dataset we generated will serve as a roadmap for future studies verifying causality and establishing underlying biochemical mechanisms.



**Table 1. Summary of all SLE loci.**

| Locus  | CHR | Boundaries            | SNP         | Index/LD | Nearest Gene   |
|--------|-----|-----------------------|-------------|----------|----------------|
| LOC_1  | 1   | 1156655 - 1191870     | rs6697886   | 1/104    | C1QTNF12       |
| LOC_2  | 1   | 8431607 - 8505058     | rs301807    | 1/10     | RERE           |
| LOC_3  | 1   | 24518206 - 24519920   |             | 1/1      | IFNLRO         |
| LOC_4  | 1   | 38258007 - 38379018   | rs28469609  | 1/43     | MTF1           |
| LOC_5  | 1   | 67787691 - 67891029   | rs11209064  | 2/55     | IL12RB2        |
| LOC_6  | 1   | 114303808 - 114377568 |             | 2/0      | PTPN22         |
| LOC_7  | 1   | 117040622 - 117104215 | rs10924104  | 2/40     | CD58; NAP1L4P1 |
| LOC_8  | 1   | 157108159 - 157119915 | rs116785379 | 1/2      | ETV3           |
| LOC_9  | 1   | 157486336 - 157538786 | rs34273689  | 1/90     | FCRL5          |
| LOC_10 | 1   | 161469054 - 161596283 |             | 3/30     | FCGR2A; FCGR2C |
| LOC_11 | 1   | 173177392 - 173376184 | rs6664517   | 13/157   | AL645568.1     |
| LOC_12 | 1   | 174396030 - 174923045 | rs72717613  | 1/420    | RABGAP1L       |
| LOC_13 | 1   | 183225237 - 183591098 | rs10911363  | 7/39     | NCF2           |
| LOC_14 | 1   | 184636486 - 184723135 |             | 1/39     | EDEM3          |
| LOC_15 | 1   | 192513661 - 192544795 | rs2984920   | 1/34     | AL390957.1     |
| LOC_16 | 1   | 198543027 - 198670469 |             | 2/116    | PTPRC          |
| LOC_17 | 1   | 201977073 - 201986311 |             | 1/0      | ELF3           |
| LOC_18 | 1   | 206642539 - 206647450 |             | 2/7      | IKBKE          |
| LOC_19 | 1   | 206939904 - 206955041 | rs3024493   | 1/3      | IL10; IL19     |
| LOC_20 | 1   | 235890096 - 236041129 | rs4660117   | 1/27     | LYST           |
| LOC_21 | 1   | 246434447 - 246444082 |             | 1/3      | SMYD3          |
| LOC_22 | 2   | 7573079 - 7584668     |             | 1/24     | AC013460.1     |
| LOC_23 | 2   | 30442402 - 30492116   | rs906866    | 3/48     | LBH            |
| LOC_24 | 2   | 33701890 - 33702203   | rs13385731  | 2/0      | RASGRP3        |
| LOC_25 | 2   | 61040651 - 61173382   |             | 1/11     | LINC01185      |
| LOC_26 | 2   | 65559027 - 65667272   | rs1876518   | 3/58     | SPRED2         |
| LOC_27 | 2   | 74200833 - 74219948   |             | 3/24     | TET3           |
| LOC_28 | 2   | 111868604 - 111940585 | rs12613243  | 1/20     | BCL2L11        |
| LOC_29 | 2   | 136555659 - 136761853 | rs2278682   | 3/75     | LCT; MCM6      |
| LOC_30 | 2   | 144013184 - 144028568 | rs10153706  | 1/28     | ARHGAP15       |
| LOC_31 | 2   | 163025929 - 163211491 |             | 5/244    | FAP; IFIH1     |
| LOC_32 | 2   | 191399581 - 191434502 |             | 1/0      | AC108047.1     |
| LOC_33 | 2   | 191900449 - 191973034 | rs7574865   | 8/38     | STAT4          |
| LOC_34 | 2   | 198492316 - 198954774 | rs13034353  | 2/216    | PLCL1          |
| LOC_35 | 2   | 204690355 - 204738919 |             | 1/52     | CTLA3          |
| LOC_36 | 2   | 213585035 - 213593970 |             | 1/3      | AC093865.1     |
| LOC_37 | 2   | 213862922 - 213890232 |             | 1/9      | IKZF2          |
| LOC_38 | 3   | 28068394 - 28079260   | rs1813375   | 1/15     | LINC01967      |
| LOC_39 | 3   | 58261741 - 58473899   |             | 4/56     | PXK            |
| LOC_40 | 3   | 72200387 - 72256927   | rs7637844   | 1/0      | LINC00870      |
| LOC_41 | 3   | 119111870 - 119272391 | rs9877891   | 7/22     | TIMMDC1; CD80  |
| LOC_42 | 3   | 159625393 - 159748367 | rs2936303   | 3/62     | IL12A-AS1      |
| LOC_43 | 3   | 169476991 - 169528523 | rs3821383   | 3/47     | LRRC34         |
| LOC_44 | 3   | 188451078 - 188472383 | rs1568669   | 1/11     | LPP            |
| LOC_45 | 4   | 953193 - 983809       | rs11248061  | 3/16     | DGKQ           |
| LOC_46 | 4   | 2540146 - 2760732     | rs4690053   | 2/126    | FAM193A        |
| LOC_47 | 4   | 8558199 - 8568191     |             | 1/11     | GPR78          |

| Locus  | CHR | Boundaries            | SNP         | Index/LD | Nearest Gene    |
|--------|-----|-----------------------|-------------|----------|-----------------|
| LOC_48 | 4   | 40301264 - 40308368   | rs13136820  | 1/4      | LINC02265       |
| LOC_49 | 4   | 55547533 - 55553801   |             | 1/10     | KIT             |
| LOC_50 | 4   | 79626160 - 79679733   |             | 1/31     | AC112253.1      |
| LOC_51 | 4   | 84141253 - 84161920   | rs4693592   | 1/51     | AC114781.2      |
| LOC_52 | 4   | 87888054 - 87976055   | rs340643    | 2/50     | AFF1            |
| LOC_53 | 4   | 102712542 - 102762581 | rs6811141   | 6/70     | BANK1           |
| LOC_54 | 4   | 108968701 - 109090112 |             | 1/0      | LEF1            |
| LOC_55 | 4   | 123073009 - 123551032 |             | 2/76     | ADAD1; IL21     |
| LOC_56 | 4   | 184603297 - 184618470 |             | 1/5      | TRAPPC11        |
| LOC_57 | 5   | 1282319 - 1286516     |             | 2/6      | TERT            |
| LOC_58 | 5   | 35850149 - 35916174   |             | 1/10     | IL7R; CAPSL     |
| LOC_59 | 5   | 100084878 - 100291657 | rs10060686  | 3/216    | ST8SIA4         |
| LOC_60 | 5   | 127733961 - 127853142 |             | 1/15     | FBN2            |
| LOC_61 | 5   | 130665788 - 131259361 |             | 1/4      | FNIP1           |
| LOC_62 | 5   | 131812897 - 131835395 | rs61175929  | 1/60     | IRF1            |
| LOC_63 | 5   | 133418739 - 133433641 |             | 3/21     | AC008608.1      |
| LOC_64 | 5   | 150386395 - 150462638 | rs10036748  | 5/26     | GPX3; TNIP1     |
| LOC_65 | 5   | 158883027 - 158944457 |             | 1/6      | LINC01845       |
| LOC_66 | 5   | 159879978 - 159887336 | rs2431697   | 2/0      | MIR3142HG       |
| LOC_67 | 6   | 238790 - 259719       |             | 2/24     | AL035696.1      |
| LOC_68 | 6   | 16299343 - 16761722   |             | 1/0      | ATXN1           |
| LOC_69 | 6   | 25184408 - 26339131   | rs17598658  | 4/93     | CARMIL1; H2BC6  |
| LOC_70 | 6   | 27498217 - 27665920   | rs10807029  | 1/20     | CD83P1          |
| LOC_71 | 6   | 34549107 - 35356143   | rs6934662   | 8/794    | PPARD           |
| LOC_72 | 6   | 36695519 - 36722789   | rs236469    | 1/26     | CPNE5           |
| LOC_73 | 6   | 90936894 - 91002494   | rs614120    | 1/13     | BACH2           |
| LOC_74 | 6   | 106564236 - 106598933 |             | 3/15     | ATG5            |
| LOC_75 | 6   | 116690849 - 116694120 |             | 2/0      | DSE             |
| LOC_76 | 6   | 137959235 - 138243739 | rs200820567 | 9/49     | TNFAIP3         |
| LOC_77 | 6   | 154562302 - 154579861 | rs2141289   | 1/15     | AL357075.4      |
| LOC_78 | 7   | 28142088 - 28209953   | rs702814    | 3/15     | JAZF1           |
| LOC_79 | 7   | 50227828 - 50348043   | rs876039    | 6/26     | IKZF1           |
| LOC_80 | 7   | 67014434 - 67084823   |             | 1/36     | MTATP6P21       |
| LOC_81 | 7   | 73434106 - 74193642   |             | 5/37     | GTF2IRD1        |
| LOC_82 | 7   | 75167934 - 75209951   |             | 6/21     | HIP1            |
| LOC_83 | 7   | 128563721 - 128764737 | rs3778752   | 14/114   | IRF5; TNPO3     |
| LOC_84 | 8   | 8088230 - 8155475     | rs2945248   | 2/44     | ALG1L13P        |
| LOC_85 | 8   | 8622877 - 8649881     | rs2428      | 1/30     | MFHAS1          |
| LOC_86 | 8   | 10712945 - 10802146   | rs6985109   | 5/55     | XKR6            |
| LOC_87 | 8   | 11270993 - 11402063   | rs67934857  | 13/84    | AF131216.5; BLK |
| LOC_88 | 8   | 42128820 - 42189978   |             | 1/0      | IKBKB           |
| LOC_89 | 8   | 56835673 - 57044066   | rs189658553 | 2/198    | LYN; RPS20      |
| LOC_90 | 8   | 71017438 - 71330166   | rs71517442  | 2/95     | NCOA2           |
| LOC_91 | 8   | 72891748 - 72913114   | rs9298192   | 1/14     | MSC-AS1         |
| LOC_92 | 8   | 79555186 - 79657666   | rs3808619   | 2/65     | ZC2HC1A; IL7    |
| LOC_93 | 8   | 128192981 - 128197856 | rs2456452   | 1/11     | CASC19          |
| LOC_94 | 8   | 129324232 - 129465024 |             | 2/50     | LINC00824       |
| LOC_95 | 9   | 4981602 - 4984530     |             | 1/1      | JAK2            |

| Locus   | CHR | Boundaries            | SNP        | Index/LD | Nearest Gene |
|---------|-----|-----------------------|------------|----------|--------------|
| LOC_96  | 9   | 21171267 - 21320324   | rs10757201 | 2/147    | IFNA22P      |
| LOC_97  | 9   | 102337143 - 102605963 | rs1405209  | 2/64     | NR4A3        |
| LOC_98  | 10  | 5894714 - 5914581     |            | 1/12     | ANKRD16      |
| LOC_99  | 10  | 50014917 - 50122181   | rs7086101  | 5/121    | WDFY4        |
| LOC_100 | 10  | 63785089 - 63825807   | rs56140430 | 2/21     | ARID5B       |
| LOC_101 | 10  | 64399617 - 64443139   | rs2393909  | 2/24     | AC067752.1   |
| LOC_102 | 10  | 73466709 - 73506129   | rs3802712  | 2/34     | CDH23        |
| LOC_103 | 10  | 104973061 - 105175131 |            | 1/25     | NT5C2; INA   |
| LOC_104 | 10  | 105671683 - 105700775 |            | 1/5      | STN1         |
| LOC_105 | 10  | 112633671 - 112799757 | rs73343848 | 1/27     | BBIP1        |
| LOC_106 | 11  | 551235 - 635569       | rs59115876 | 5/87     | IRF7; CDHR5  |
| LOC_107 | 11  | 3875757 - 4114440     |            | 1/0      | STIM1        |
| LOC_108 | 11  | 18303597 - 18362382   |            | 1/1      | HPSS; GTF2H1 |
| LOC_109 | 11  | 35070068 - 35123574   | rs2785201  | 5/51     | PDHX         |
| LOC_110 | 11  | 65378028 - 65564926   | rs10791824 | 4/31     | AP5B1; OVOL1 |
| LOC_111 | 11  | 68814887 - 68869034   | rs7942690  | 2/35     | TPCN2        |
| LOC_112 | 11  | 71132868 - 71225082   | rs11606611 | 1/66     | NADSYN1      |
| LOC_113 | 11  | 72499768 - 72895102   |            | 3/6      | FCHSD2       |
| LOC_114 | 11  | 118480115 - 118735476 | rs2508573  | 4/42     | DDX6         |
| LOC_115 | 11  | 128297318 - 128504173 | rs12576753 | 6/17     | ETS1         |
| LOC_116 | 12  | 4134873 - 4152163     |            | 1/7      | AC084375.1   |
| LOC_117 | 12  | 12760658 - 12874462   | rs12811932 | 5/44     | CDKN1B       |
| LOC_118 | 12  | 43130547 - 43200941   |            | 1/9      | LINC02450    |
| LOC_119 | 12  | 102271358 - 102405908 |            | 1/0      | DRAM1        |
| LOC_120 | 12  | 103912112 - 103965115 |            | 1/0      | AC084364.3   |
| LOC_121 | 12  | 111826477 - 112059557 |            | 4/8      | ATXN2        |
| LOC_122 | 12  | 121099302 - 121378566 | rs904628   | 2/141    | CABP1        |
| LOC_123 | 12  | 129276658 - 129307699 | rs35907548 | 7/71     | SLC15A4      |
| LOC_124 | 12  | 133038182 - 133042182 |            | 1/0      | AC079031.2   |
| LOC_125 | 13  | 41529773 - 41588832   | rs57668933 | 2/15     | ELF1         |
| LOC_126 | 13  | 50143361 - 50192528   |            | 1/20     | RCBTB1       |
| LOC_127 | 13  | 100084039 - 100104407 | rs749114   | 1/13     | TM9SF2       |
| LOC_128 | 14  | 35831811 - 35832666   |            | 1/1      | AL133163.2   |
| LOC_129 | 14  | 68728425 - 68760141   | rs3784099  | 2/14     | RAD51B       |
| LOC_130 | 14  | 88370343 - 88383035   | rs28626750 | 1/13     | GALC         |
| LOC_131 | 14  | 103238582 - 103290221 | rs12880641 | 1/62     | TRAF3        |
| LOC_132 | 14  | 105386039 - 105416010 | rs2819426  | 3/51     | PLD4; AHNAK2 |
| LOC_133 | 15  | 38728250 - 38927386   | rs7173565  | 4/10     | RASGRP1      |
| LOC_134 | 15  | 75079474 - 75392795   | rs34180494 | 3/23     | CSK; SCAMP5  |
| LOC_135 | 15  | 77824646 - 77830430   | rs1317320  | 1/19     | AC046168.1   |
| LOC_136 | 15  | 97595545 - 97626101   |            | 1/9      | AC055873.1   |
| LOC_137 | 15  | 101529012 - 101550214 |            | 1/1      | LRRK1        |
| LOC_138 | 16  | 11038360 - 11291722   | rs2041670  | 7/82     | CLEC16A      |
| LOC_139 | 16  | 23871457 - 23901376   |            | 2/1      | PRKCB        |
| LOC_140 | 16  | 30584430 - 30827205   | rs3812999  | 2/88     | PRR14; RNF40 |
| LOC_141 | 16  | 31260235 - 31369803   | rs4632147  | 7/100    | ITGAM; ITGAX |
| LOC_142 | 16  | 50068422 - 50139799   |            | 1/67     | HEATR3       |
| LOC_143 | 16  | 57352124 - 57403500   | rs9921681  | 3/13     | CCL22        |

| Locus   | CHR | Boundaries            | SNP         | Index/LD | Nearest Gene    |
|---------|-----|-----------------------|-------------|----------|-----------------|
| LOC_144 | 16  | 58247523 - 58268561   | rs2731741   | 1/70     | CCDC113         |
| LOC_145 | 16  | 68551277 - 68663156   | rs28537207  | 3/197    | ZFP90; RNU4-36P |
| LOC_146 | 16  | 79739978 - 79755446   |             | 1/25     | MAFTRR          |
| LOC_147 | 16  | 85966683 - 86020039   | rs8052690   | 6/42     | AC092723.4      |
| LOC_148 | 16  | 87390630 - 87443734   | rs10431963  | 1/26     | MAP1LC3B        |
| LOC_149 | 17  | 4706123 - 4712617     |             | 1/4      | PLD2            |
| LOC_150 | 17  | 7208373 - 7240391     |             | 2/8      | ACAP1           |
| LOC_151 | 17  | 16839901 - 16845467   |             | 2/1      | TNFRSF13B       |
| LOC_152 | 17  | 37885383 - 38088150   | rs34758895  | 7/245    | MIEN1; IKZF3    |
| LOC_153 | 17  | 43422855 - 43457886   |             | 1/5      | RNA5SP443       |
| LOC_154 | 17  | 47448102 - 47554350   | rs2671655   | 1/0      | AC091180.5      |
| LOC_155 | 17  | 73304710 - 73417662   | rs8072449   | 3/158    | GRB2            |
| LOC_156 | 17  | 76372972 - 76393736   |             | 1/5      | PGS1            |
| LOC_157 | 18  | 67518031 - 67562657   | rs1788103   | 3/36     | CD226           |
| LOC_158 | 18  | 77377925 - 77386912   | rs118075465 | 1/7      | AC068473.4      |
| LOC_159 | 19  | 936297 - 952429       | rs2238580   | 1/16     | ARID3A          |
| LOC_160 | 19  | 2131148 - 2208859     | rs2864419   | 1/49     | DOT1L           |
| LOC_161 | 19  | 6689065 - 6699330     |             | 1/31     | C3              |
| LOC_162 | 19  | 10392638 - 10481532   | rs2569693   | 5/20     | TYK2            |
| LOC_163 | 19  | 16438661 - 16443718   | rs11086029  | 1/9      | KLF2            |
| LOC_164 | 19  | 18383794 - 18637194   | rs28375303  | 3/100    | IQCNI; SSBP4    |
| LOC_165 | 19  | 33035097 - 33106621   |             | 2/21     | PDCD5           |
| LOC_166 | 19  | 49788205 - 49918814   | rs7257053   | 2/45     | SLC6A16; TEAD2  |
| LOC_167 | 19  | 50162909 - 50182697   |             | 1/2      | IRF3            |
| LOC_168 | 19  | 52021247 - 52127053   |             | 2/30     | SIGLEC6         |
| LOC_169 | 19  | 55730976 - 55739813   |             | 2/15     | TMEM86B         |
| LOC_170 | 20  | 1507507 - 1558508     |             | 1/27     | AL049634.1      |
| LOC_171 | 20  | 44730245 - 44749251   |             | 1/11     | CD40            |
| LOC_172 | 20  | 48429020 - 48605930   | rs117447227 | 1/92     | RNF114          |
| LOC_173 | 22  | 18648861 - 18654105   |             | 1/19     | USP18           |
| LOC_174 | 22  | 21798351 - 21985094   | rs1034329   | 7/110    | UBE2L3; YDJC    |
| LOC_175 | 22  | 39739187 - 39756650   | rs2069235   | 2/9      | SYNGR1          |
| LOC_176 | 22  | 40291139 - 40317126   |             | 1/13     | GRAP2           |
| LOC_177 | X   | 12839152 - 12907658   |             | 3/3      | PRPS2           |
| LOC_178 | X   | 30572729 - 30577846   |             | 1/5      | CXorf21         |
| LOC_179 | X   | 53081414 - 53111428   |             | 1/37     | GPR173          |
| LOC_180 | X   | 56295245 - 57406814   | rs5913948   | 2/1146   | KLF8; NBDY      |
| LOC_181 | X   | 149663590 - 149673253 |             | 1/5      | MAMLD1          |
| LOC_182 | X   | 153189819 - 153378375 | rs3027878   | 11/95    | IRAK1; MECP2    |



**Table 2. Six most significant SNPs and their target genes.**

| rsID       | CHR | Risk/Non-Risk | Closest Gene | Common target genes |
|------------|-----|---------------|--------------|---------------------|
| rs13385731 | 2   | T/C           | RASGRP3      | RASGRP3, FAM98A     |
| rs2936303  | 3   | G/A           | IL12A-AS1    | IL12A, TRIM59       |
| rs10036748 | 5   | T/C           | TNIP1        | TNIP1, ANXA6, GPX3  |
| rs2431697  | 5   | T/C           | MIR3142HG    | PTTG1, SLU7         |
| rs57668933 | 13  | C/T           | ELF1         | ELF1                |
| rs2069235  | 22  | A/G           | SYNGR1       | PDGFB, MGAT3, RPL3  |

**Figure 1.** Study framework and summary. Tier 1: PCHiC and QTL with at least one same target gene, Tier 2: PCHiC and QTL with different targets, Tier 3a: Only PCHiC target, Tier 3b: Only

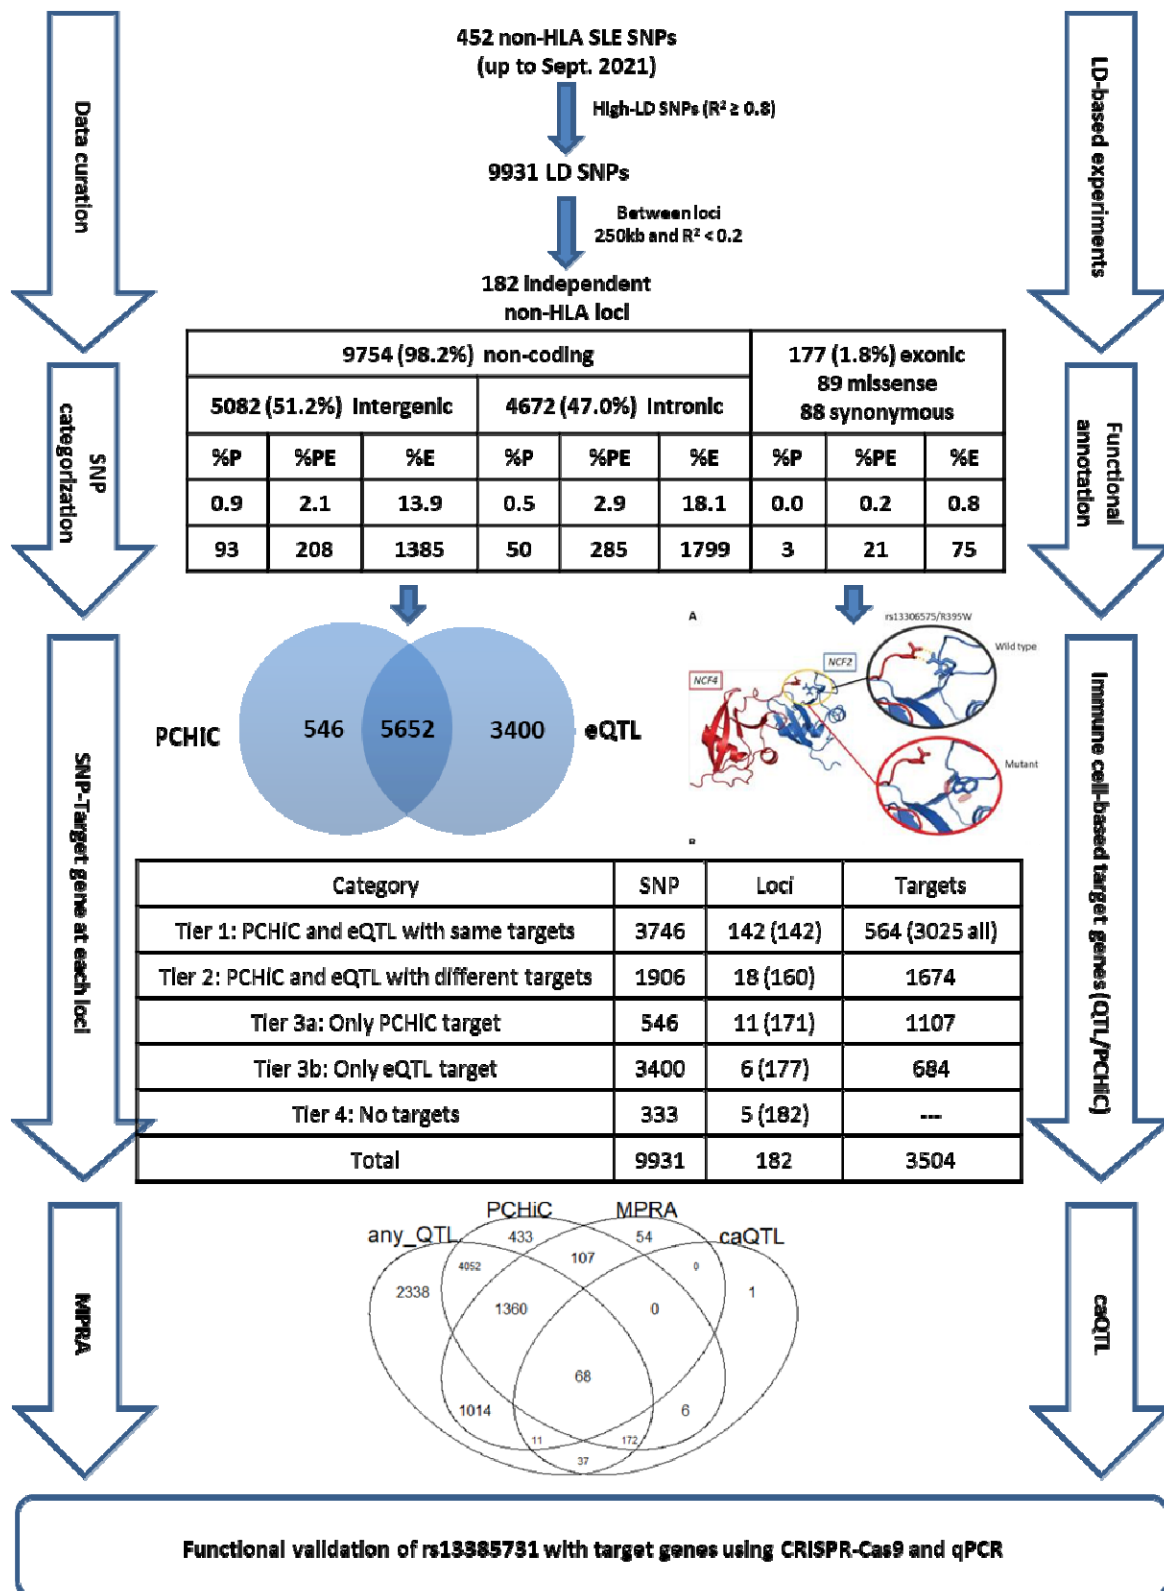

QTL target, Tier 4: No targets

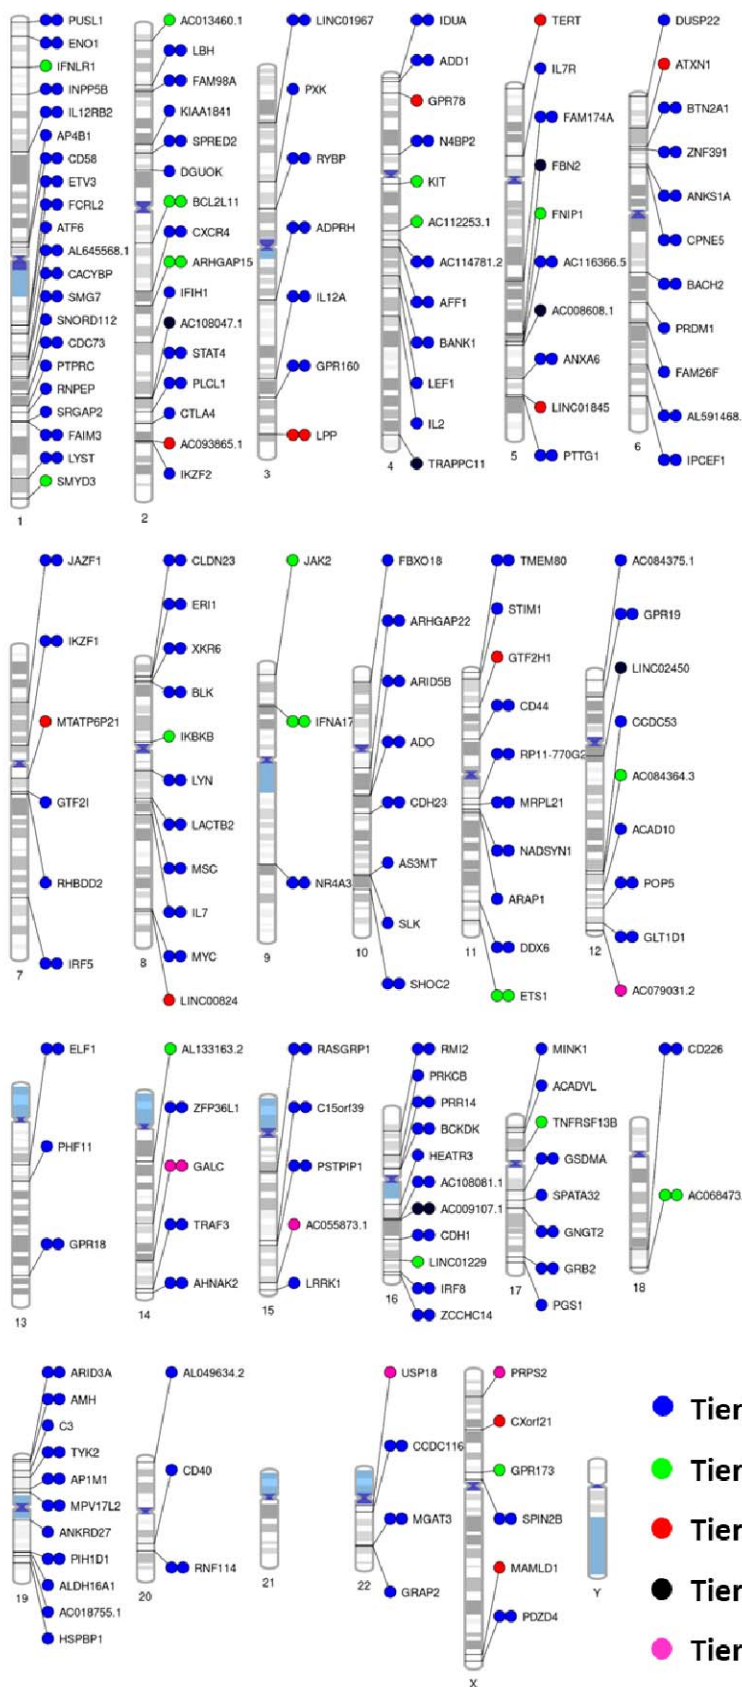

**Figure 2.** Distribution of 182 non-HLA SLE loci across the human genome. Loci colored by highest SNP tier. Tier1 names are common target genes from both eQTL and PCHiC data; other tiers are named by closest positional gene. Loci with double dot have  $\geq 1$  significant experimentally validated (caQTL or MPRA) allele-specific SNP. Single dots mean no experimentally validated SNPs are yet known.

**Figure 3.** Analysis of LOC\_125. This locus has two index SNPs and 15 high-LD SNPs. Of these, rs57668933 is a caQTL-SNP and has allele-specific enhancer activity. a) Visualized connections of rs57668933 and neighboring regions based on PCHiC, alongside various histone marks. b) The SNP lies in *ELF1*, a significant eQTL gene. Significant genotype-specific gene expression in follicular T-helper cells (Tfh), CD16<sup>+</sup> monocytes, and unstimulated and stimulated B-cells; c) chromatin accessibility of alleles. Reference allele T has higher chromatin accessibility. d) MPRA data shows T has higher enhancer activity. e) CRISPR-dCas9-based targeting of rs57668933-containing region by two activators (dCas9-VPR and dCas9-TET1) and two suppressors (dCas9-MECP2, dCas9-LSD1) and *ELF1* (target gene) mRNA expression.

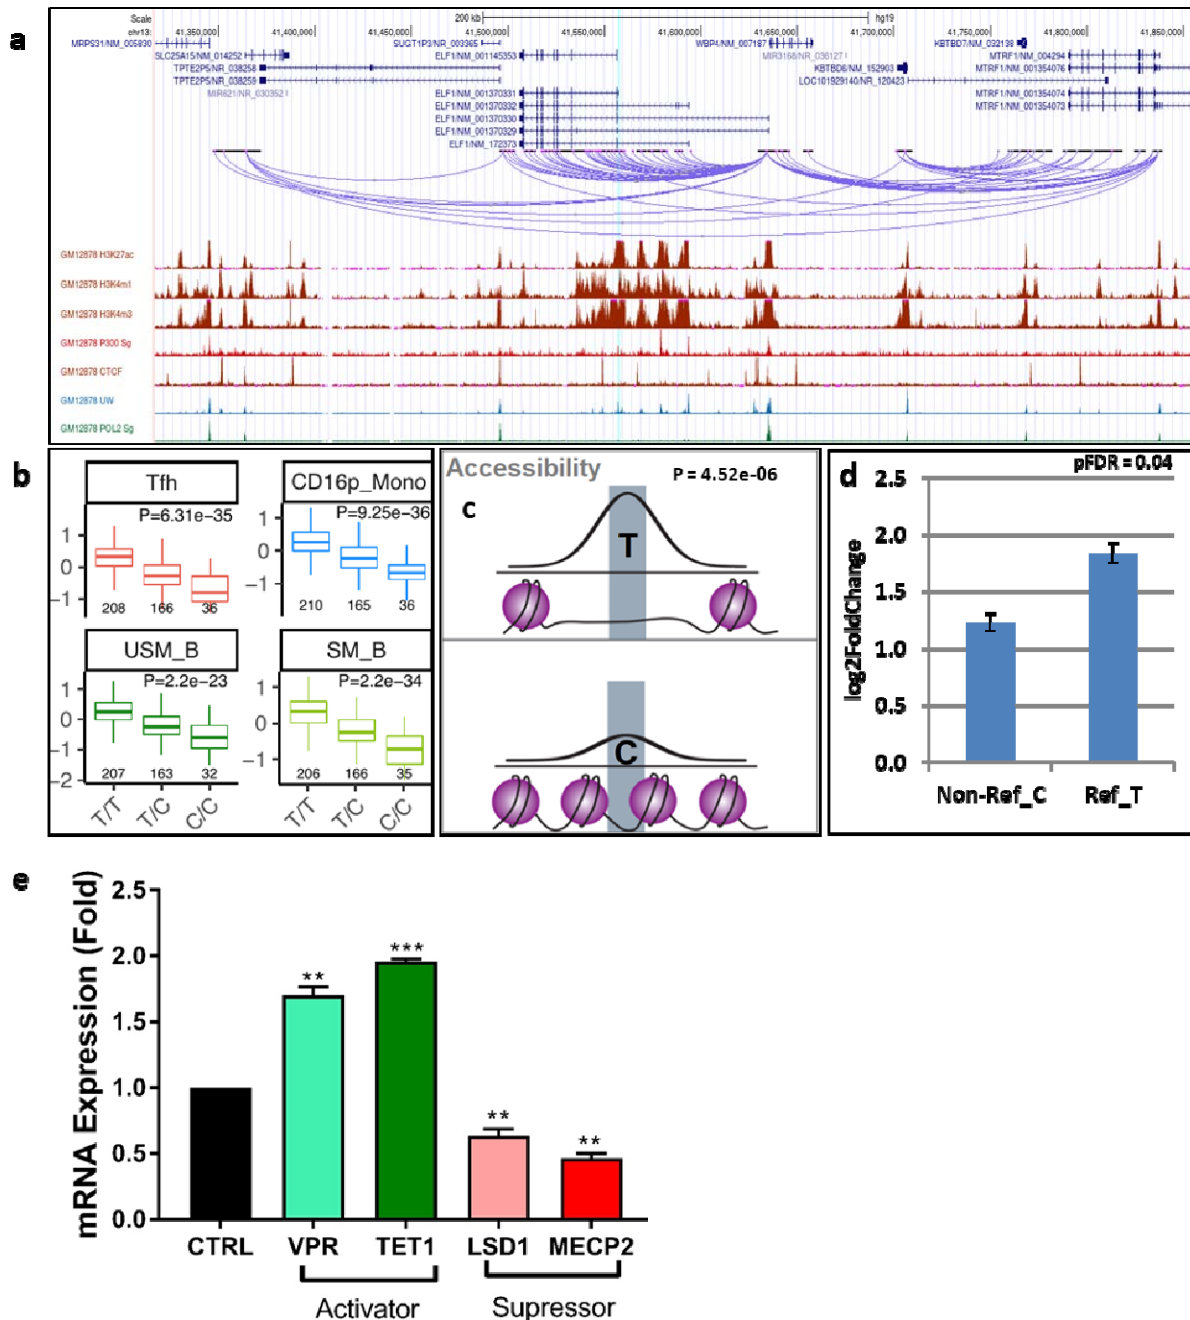





## REFERENCES

- 1 Alarcon-Segovia, D. *et al.* Familial aggregation of systemic lupus erythematosus, rheumatoid arthritis, and other autoimmune diseases in 1,177 lupus patients from the GLADEL cohort. *Arthritis Rheum* **52**, 1138-1147 (2005).  
<https://doi.org/10.1002/art.20999>
- 2 Kuo, C. F. *et al.* Familial Aggregation of Systemic Lupus Erythematosus and Coaggregation of Autoimmune Diseases in Affected Families. *JAMA Intern Med* **175**, 1518-1526 (2015). <https://doi.org/10.1001/jamainternmed.2015.3528>
- 3 Sestak, A. L., Shaver, T. S., Moser, K. L., Neas, B. R. & Harley, J. B. Familial aggregation of lupus and autoimmunity in an unusual multiplex pedigree. *J Rheumatol* **26**, 1495-1499 (1999).
- 4 Deapen, D. *et al.* A revised estimate of twin concordance in systemic lupus erythematosus. *Arthritis Rheum* **35**, 311-318 (1992).
- 5 Lawrence, J. S., Martins, C. L. & Drake, G. L. A family survey of lupus erythematosus. 1. Heritability. *J Rheumatol* **14**, 913-921 (1987).
- 6 Bentham, J. *et al.* Genetic association analyses implicate aberrant regulation of innate and adaptive immunity genes in the pathogenesis of systemic lupus erythematosus. *Nat Genet* **47**, 1457-1464 (2015). <https://doi.org/10.1038/ng.3434>
- 7 Molineros, J. E. *et al.* Confirmation of five novel susceptibility loci for systemic lupus erythematosus (SLE) and integrated network analysis of 82 SLE susceptibility loci. *Hum Mol Genet* **26**, 1205-1216 (2017). <https://doi.org/10.1093/hmg/ddx026>
- 8 Morris, D. L. *et al.* Genome-wide association meta-analysis in Chinese and European individuals identifies ten new loci associated with systemic lupus erythematosus. *Nat Genet* (2016). <https://doi.org/10.1038/ng.3603>
- 9 Sun, C. *et al.* High-density genotyping of immune-related loci identifies new SLE risk variants in individuals with Asian ancestry. *Nat Genet* (2016).  
<https://doi.org/10.1038/ng.3496>
- 10 Wang, Y. F. *et al.* Identification of 38 novel loci for systemic lupus erythematosus and genetic heterogeneity between ancestral groups. *Nat Commun* **12**, 772 (2021).  
<https://doi.org/10.1038/s41467-021-21049-y>
- 11 Yin, X. *et al.* Meta-analysis of 208370 East Asians identifies 113 susceptibility loci for systemic lupus erythematosus. *Ann Rheum Dis* (2020).  
<https://doi.org/10.1136/annrheumdis-2020-219209>
- 12 Langefeld, C. D. *et al.* Transancestral mapping and genetic load in systemic lupus erythematosus. *Nat Commun* **8**, 16021 (2017). <https://doi.org/10.1038/ncomms16021>
- 13 Flister, M. J. *et al.* Identifying multiple causative genes at a single GWAS locus. *Genome Res* **23**, 1996-2002 (2013). <https://doi.org/10.1101/gr.160283.113>. Epub 2013 Sep 4.
- 14 MacArthur, D. G. *et al.* Guidelines for investigating causality of sequence variants in human disease. *Nature* **508**, 469-476 (2014). <https://doi.org/10.1038/nature13127>
- 15 Gallagher, M. D. & Chen-Plotkin, A. S. The Post-GWAS Era: From Association to Function. *Am J Hum Genet* **102**, 717-730 (2018).  
<https://doi.org/10.1016/j.ajhg.2018.04.002>
- 16 Gotoda, T. From Association to Function in the Post-GWAS Era. *J Atheroscler Thromb* **22**, 442-444 (2015). <https://doi.org/10.5551/jat.ED017>. Epub 2015 Apr 30.

- 17 Watanabe, K., Taskesen, E., van Bochoven, A. & Posthuma, D. Functional mapping and annotation of genetic associations with FUMA. *Nat Commun* **8**, 1826 (2017). <https://doi.org/10.1038/s41467-017-01261-5>.
- 18 Cano-Gamez, E. & Trynka, G. From GWAS to Function: Using Functional Genomics to Identify the Mechanisms Underlying Complex Diseases. *Front Genet* **11**, 424 (2020). <https://doi.org/10.3389/fgene.2020.00424>
- 19 Simovski, B. *et al.* Coloc-stats: a unified web interface to perform colocalization analysis of genomic features. *Nucleic Acids Research* **46**, W186-W193 (2018). <https://doi.org/10.1093/nar/gky474>
- 20 Trynka, G. *et al.* Disentangling the Effects of Colocalizing Genomic Annotations to Functionally Prioritize Non-coding Variants within Complex-Trait Loci. *Am J Hum Genet* **97**, 139-152 (2015). <https://doi.org/10.1016/j.ajhg.2015.05.016>.
- 21 Hormozdiari, F. *et al.* Colocalization of GWAS and eQTL Signals Detects Target Genes. *Am J Hum Genet* **99**, 1245-1260 (2016). <https://doi.org/10.1016/j.ajhg.2016.10.003>. Epub 2016 Nov 17.
- 22 Buenrostro, J. D., Giresi, P. G., Zaba, L. C., Chang, H. Y. & Greenleaf, W. J. Transposition of native chromatin for fast and sensitive epigenomic profiling of open chromatin, DNA-binding proteins and nucleosome position. *Nat Methods* **10**, 1213-1218 (2013). <https://doi.org/10.1038/nmeth.2688>. Epub 2013 Oct 6.
- 23 Javierre, B. M. *et al.* Lineage-Specific Genome Architecture Links Enhancers and Non-coding Disease Variants to Target Gene Promoters. *Cell* **167**, 1369-1384 e1319 (2016). <https://doi.org/10.1016/j.cell.2016.09.037>
- 24 Kim, T. H. *et al.* A high-resolution map of active promoters in the human genome. *Nature* **436**, 876-880 (2005). <https://doi.org/10.1038/nature03877>. Epub 2005 Jun 29.
- 25 Adsera, C. B., Park, Y. P., Meuleman, W. & Kellis, M. Integrative analysis of 10,000 epigenomic maps across 800 samples for regulatory genomics and disease dissection. *bioRxiv* (2019).
- 26 Doni Jayavelu, N., Jajodia, A., Mishra, A. & Hawkins, R. D. Candidate silencer elements for the human and mouse genomes. *Nat Commun* **11**, 1061 (2020). <https://doi.org/10.1038/s41467-020-14853-5>
- 27 Zacher, B. *et al.* Accurate Promoter and Enhancer Identification in 127 ENCODE and Roadmap Epigenomics Cell Types and Tissues by GenoSTAN. *PLoS One* **12**, e0169249 (2017). <https://doi.org/10.1371/journal.pone.0169249>
- 28 Broekema, R. V., Bakker, O. B. & Jonkers, I. H. A practical view of fine-mapping and gene prioritization in the post-genome-wide association era. *Open Biol* **10**, 190221 (2020). <https://doi.org/10.1098/rsob.190221>
- 29 Tehranchi, A. *et al.* Fine-mapping cis-regulatory variants in diverse human populations. *Elife* **8** (2019). <https://doi.org/10.7554/eLife.39595>
- 30 Cavalli, G. & Misteli, T. Functional implications of genome topology. *Nat Struct Mol Biol* **20**, 290-299 (2013). <https://doi.org/10.1038/nsmb.2474>.
- 31 Rao, S. S. *et al.* A 3D map of the human genome at kilobase resolution reveals principles of chromatin looping. *Cell* **159**, 1665-1680 (2014). <https://doi.org/10.1016/j.cell.2014.11.021>. Epub 2014 Dec 11.
- 32 Mifsud, B. *et al.* Mapping long-range promoter contacts in human cells with high-resolution capture Hi-C. *Nat Genet* (2015). <https://doi.org/10.1038/ng.3286>

- 33 Dixon, J. R. *et al.* Topological domains in mammalian genomes identified by analysis of  
chromatin interactions. *Nature* **485**, 376-380 (2012). <https://doi.org/10.1038/nature11082>.
- 34 Symmons, O. *et al.* Functional and topological characteristics of mammalian regulatory  
domains. *Genome Res* **24**, 390-400 (2014). <https://doi.org/10.1101/gr.163519.113>. Epub  
2014 Jan 7.
- 35 Inoue, F. & Ahituv, N. Decoding enhancers using massively parallel reporter assays.  
*Genomics* **106**, 159-164 (2015). <https://doi.org/10.1016/j.ygeno.2015.06.005>
- 36 The GTEx Consortium atlas of genetic regulatory effects across human tissues. *Science*  
**369**, 1318 (2020). <https://doi.org/10.1126/science.aaz1776>
- 37 Chandra, V. *et al.* Promoter-interacting expression quantitative trait loci are enriched for  
functional genetic variants. *Nature Genetics* **53**, 110-119 (2021).  
<https://doi.org/10.1038/s41588-020-00745-3>
- 38 Munz, M. *et al.* Qtlizer: comprehensive QTL annotation of GWAS results. *Scientific  
Reports* **10**, 20417 (2020). <https://doi.org/10.1038/s41598-020-75770-7>
- 39 Westra, H. J. *et al.* Systematic identification of trans eQTLs as putative drivers of known  
disease associations. *Nat Genet* **45**, 1238-1243 (2013). <https://doi.org/10.1038/ng.2756>.  
Epub 2013 Sep 8.
- 40 Maurano, M. T. *et al.* Systematic localization of common disease-associated variation in  
regulatory DNA. *Science* **337**, 1190-1195 (2012).  
<https://doi.org/10.1126/science.1222794>
- 41 Fonseka, C. Y., Rao, D. A. & Raychaudhuri, S. Leveraging blood and tissue CD4+ T cell  
heterogeneity at the single cell level to identify mechanisms of disease in rheumatoid  
arthritis. *Current opinion in immunology* **49**, 27-36 (2017).  
<https://doi.org/10.1016/j.coi.2017.08.005>
- 42 Baxter, J. S. *et al.* Capture Hi-C identifies putative target genes at 33 breast cancer risk  
loci. *Nat Commun* **9**, 1028 (2018). <https://doi.org/10.1038/s41467-018-03411-9>.
- 43 Stergachis, A. B. *et al.* Exonic transcription factor binding directs codon choice and  
affects protein evolution. *Science* **342**, 1367-1372 (2013).  
<https://doi.org/10.1126/science.1243490>
- 44 Machiela, M. J. & Chanock, S. J. LDlink: a web-based application for exploring  
population-specific haplotype structure and linking correlated alleles of possible  
functional variants. *Bioinformatics* **31**, 3555-3557 (2015).  
<https://doi.org/10.1093/bioinformatics/btv402>. Epub 2015 Jul 2.
- 45 Bendl, J. *et al.* PredictSNP2: A Unified Platform for Accurately Evaluating SNP Effects  
by Exploiting the Different Characteristics of Variants in Distinct Genomic Regions.  
*PLoS computational biology* **12**, e1004962 (2016).  
<https://doi.org/10.1371/journal.pcbi.1004962>
- 46 Frankish, A. *et al.* GENCODE reference annotation for the human and mouse genomes.  
*Nucleic Acids Research* **47**, D766-D773 (2019). <https://doi.org/10.1093/nar/gky955>
- 47 GENCODE. *Human Release 36 (mapped to GRCh37) [Internet]*,  
<[https://www.genencodegenes.org/human/release\\_36lift37.html](https://www.genencodegenes.org/human/release_36lift37.html)> (
- 48 Ward, L. D. & Kellis, M. HaploReg: a resource for exploring chromatin states,  
conservation, and regulatory motif alterations within sets of genetically linked variants.  
*Nucleic Acids Res* **40**, D930-934 (2012). <https://doi.org/10.1093/nar/gkr917>. Epub 2011  
Nov 7.

- 49 Võsa, U. *et al.* Large-scale cis- and trans-eQTL analyses identify thousands of genetic loci and polygenic scores that regulate blood gene expression. *Nat Genet* **53**, 1300-1310 (2021). <https://doi.org/10.1038/s41588-021-00913-z>
- 50 Ota, M. *et al.* Dynamic landscape of immune cell-specific gene regulation in immune-mediated diseases. *Cell* **184**, 3006-3021.e3017 (2021). <https://doi.org/10.1016/j.cell.2021.03.056>
- 51 Lu, X. *et al.* Global discovery of lupus genetic risk variant allelic enhancer activity. *Nat Commun* **12**, 1611 (2021). <https://doi.org/10.1038/s41467-021-21854-5>
- 52 Zhou, Y., Sun, Y., Huang, D. & Li, M. J. epiCOLOC: Integrating Large-Scale and Context-Dependent Epigenomics Features for Comprehensive Colocalization Analysis. *Frontiers in Genetics* **11** (2020). <https://doi.org/10.3389/fgene.2020.00053>
- 53 Singh B, M. G. P. Z. X. F.-N. M. B. S. C. S. C. T. C. O. Y. C. K. H. K. Y. G. Lupus susceptibility region containing CDKN1B rs34330 mechanistically influences expression and function of multiple target genes, also linked to proliferation and apoptosis. *Arthritis Rheumatol* (2021).
- 54 Kim-Howard, X. *et al.* Allelic heterogeneity in NCF2 associated with systemic lupus erythematosus (SLE) susceptibility across four ethnic populations. *Hum Mol Genet* **23**, 1656-1668 (2014). <https://doi.org/10.1093/hmg/ddt532>
- 55 Rusca, N. & Monticelli, S. MiR-146a in Immunity and Disease. *Mol Biol Int* **2011**, 437301 (2011). <https://doi.org/10.4061/2011/437301>
- 56 Wang, G. *et al.* Serum and urinary cell-free MiR-146a and MiR-155 in patients with systemic lupus erythematosus. *J Rheumatol* **37**, 2516-2522 (2010). <https://doi.org/10.3899/jrheum.100308>
- 57 Odqvist, L. *et al.* Genetic variations in A20 DUB domain provide a genetic link to citrullination and neutrophil extracellular traps in systemic lupus erythematosus. *Ann Rheum Dis* **78**, 1363-1370 (2019). <https://doi.org/10.1136/annrheumdis-2019-215434>
- 58 Thynn, H. N. *et al.* An Allele-Specific Functional SNP Associated with Two Systemic Autoimmune Diseases Modulates IRF5 Expression by Long-Range Chromatin Loop Formation. *J Invest Dermatol* **140**, 348-360.e311 (2020). <https://doi.org/10.1016/j.jid.2019.06.147>
- 59 Devallière, J. & Charreau, B. The adaptor Lnk (SH2B3): an emerging regulator in vascular cells and a link between immune and inflammatory signaling. *Biochem Pharmacol* **82**, 1391-1402 (2011). <https://doi.org/10.1016/j.bcp.2011.06.023>
- 60 Molineros, J. E. *et al.* Admixture Mapping in Lupus Identifies Multiple Functional Variants within IFIH1 Associated with Apoptosis, Inflammation, and Autoantibody Production. *PLOS Genetics* **9**, e1003222 (2013). <https://doi.org/10.1371/journal.pgen.1003222>
- 61 Liu, X., Li, Y. I. & Pritchard, J. K. Trans Effects on Gene Expression Can Drive Omnigenic Inheritance. *Cell* **177**, 1022-1034.e1026 (2019). <https://doi.org/10.1016/j.cell.2019.04.014>
- 62 Melnikov, A. *et al.* Systematic dissection and optimization of inducible enhancers in human cells using a massively parallel reporter assay. *Nature Biotechnology* **30**, 271-277 (2012). <https://doi.org/10.1038/nbt.2137>
- 63 Kumasaka, N., Knights, A. J. & Gaffney, D. J. Fine-mapping cellular QTLs with RASQUAL and ATAC-seq. *Nature Genetics* **48**, 206-213 (2016). <https://doi.org/10.1038/ng.3467>

- 64 Deng, Y. *et al.* Expression characteristics of interferon-stimulated genes and possible regulatory mechanisms in lupus patients using transcriptomics analyses. *EBioMedicine* **70**, 103477 (2021). <https://doi.org/10.1016/j.ebiom.2021.103477>
- 65 Gao, M., Wang, C. H., Sima, X. & Han, X. M. NFKB1 -94 insertion/deletion ATTG polymorphism contributes to risk of systemic lupus erythematosus. *DNA Cell Biol* **31**, 611-615 (2012). <https://doi.org/10.1089/dna.2011.1389>
- 66 Kitajima, T. *et al.* Histological detection of c-myc and c-myc proto-oncogene expression in infiltrating cells in cutaneous lupus erythematosus-like lesions of MRL/l mice by in situ hybridization. *Clinical Immunology and Immunopathology* **62**, 119-123 (1992). [https://doi.org/https://doi.org/10.1016/0090-1229\(92\)90031-I](https://doi.org/https://doi.org/10.1016/0090-1229(92)90031-I)
- 67 Nascimento, D. Q. *et al.* Expression of the miR-9-5p, miR-125b-5p and its target gene NFKB1 and TRAF6 in childhood-onset systemic lupus erythematosus (cSLE). *Autoimmunity* **55**, 515-519 (2022). <https://doi.org/10.1080/08916934.2022.2128781>
- 68 Sisirak, V. *et al.* Genetic evidence for the role of plasmacytoid dendritic cells in systemic lupus erythematosus. *J Exp Med* **211**, 1969-1976 (2014). <https://doi.org/10.1084/jem.20132522>
- 69 Teng, L. *et al.* TGF- $\beta$ -mediated upregulation of brachyury contributes to constitutively up-regulated type I collagen expression in skin fibroblasts: possible role in systemic sclerosis. *Eur J Dermatol* **29**, 359-365 (2019). <https://doi.org/10.1684/ejd.2019.3607>
- 70 Enomoto, T. *et al.* Adipolin/C1qdc2/CTRP12 Protein Functions as an Adipokine That Improves Glucose Metabolism \*. *Journal of Biological Chemistry* **286**, 34552-34558 (2011). <https://doi.org/10.1074/jbc.M111.277319>
- 71 Georg, I., Díaz-Barreiro, A., Morell, M., Pey, A. L. & Alarcón-Riquelme, M. E. BANK1 interacts with TRAF6 and MyD88 in innate immune signaling in B cells. *Cellular & Molecular Immunology* **17**, 954-965 (2020). <https://doi.org/10.1038/s41423-019-0254-9>
- 72 Olsson, L. M. *et al.* A single nucleotide polymorphism in the *NCF1* gene leading to reduced oxidative burst is associated with systemic lupus erythematosus. *Annals of the Rheumatic Diseases* **76**, 1607-1613 (2017). <https://doi.org/10.1136/annrheumdis-2017-211287>
- 73 Graham, R. R. *et al.* Genetic variants near TNFAIP3 on 6q23 are associated with systemic lupus erythematosus. *Nat Genet* **40**, 1059-1061 (2008). <https://doi.org/10.1038/ng.200>
- 74 Maiti, A. K. *et al.* Combined protein- and nucleic acid-level effects of rs1143679 (R77H), a lupus-predisposing variant within ITGAM. *Hum Mol Genet* **23**, 4161-4176 (2014). <https://doi.org/10.1093/hmg/ddu106>. Epub 2014 Mar 7.
- 75 Lessard, C. J. *et al.* Identification of IRF8, TMEM39A, and IKZF3-ZPBP2 as susceptibility loci for systemic lupus erythematosus in a large-scale multiracial replication study. *Am J Hum Genet* **90**, 648-660 (2012). <https://doi.org/10.1016/j.ajhg.2012.02.023>
- 76 Juang, Y. T. *et al.* Elf-1 binds to GGAA elements on the FcRgamma promoter and represses its expression. *J Immunol* **179**, 4884-4889 (2007). <https://doi.org/10.4049/jimmunol.179.7.4884>
- 77 Bergtold, A., Gavhane, A., D'Agati, V., Madaio, M. & Clynes, R. FcR-bearing myeloid cells are responsible for triggering murine lupus nephritis. *J Immunol* **177**, 7287-7295 (2006). <https://doi.org/10.4049/jimmunol.177.10.7287>

- 78 Akbarali, Y., Oettgen, P., Boltax, J. & Libermann, T. A. ELF-1 Interacts with and Transactivates the IgH Enhancer Site \*. *Journal of Biological Chemistry* **271**, 26007-26012 (1996). <https://doi.org/10.1074/jbc.271.42.26007>
- 79 Yang, A., Kaghad, M., Caput, D. & McKeon, F. On the shoulders of giants: p63, p73 and the rise of p53. *Trends Genet* **18**, 90-95 (2002). [https://doi.org/10.1016/s0168-9525\(02\)02595-7](https://doi.org/10.1016/s0168-9525(02)02595-7)
